# Supplementary material
Source: ML conference proceedings conference paper supplement (https://proceedings.mlr.press/v51/heinze16.html)
Supplement: Supplementary file 1 [file heinze16-supp.pdf]

## Supplementary Information for DUAL-LOCO: Distributing Statistical Estimation Using Random Projections

### A Supplementary Results

Here we introduce two lemmas. The first describes the random projection construction which we use in the distributed setting.

**Lemma 2** (Summing random features). *Consider the singular value decomposition  $\mathbf{X} = \mathbf{U}\mathbf{\Sigma}\mathbf{V}^\top$  where  $\mathbf{U} \in \mathbb{R}^{n \times r}$  and  $\mathbf{V} \in \mathbb{R}^{p \times r}$  have orthonormal columns and  $\mathbf{\Sigma} \in \mathbb{R}^{r \times r}$  is diagonal;  $r = \text{rank}(\mathbf{X})$ .  $c_0$  is a fixed positive constant. In addition to the raw features, let  $\tilde{\mathbf{X}}_k \in \mathbb{R}^{n \times (\tau + \tau_{\text{subs}})}$  contain random features which result from summing the  $K - 1$  random projections from the other workers. Furthermore, assume without loss of generality that the problem is permuted so that the raw features of worker  $k$ 's problem are the first  $\tau$  columns of  $\mathbf{X}$  and  $\tilde{\mathbf{X}}_k$ . Finally, let*

$$\Theta_S = \begin{bmatrix} \mathbf{I}_\tau & 0 \\ 0 & \mathbf{\Pi} \end{bmatrix} \in \mathbb{R}^{p \times (\tau + \tau_{\text{subs}})}$$

such that  $\tilde{\mathbf{X}}_k = \mathbf{X}\Theta_S$ .

With probability at least  $1 - (\delta + \frac{p-\tau}{e^r})$

$$\|\mathbf{V}^\top \Theta_S \Theta_S^\top \mathbf{V} - \mathbf{V}^\top \mathbf{V}\|_2 \leq \sqrt{\frac{c_0 \log(2r/\delta)r}{\tau_{\text{subs}}}}.$$

*Proof.* See Appendix B.  $\square$

**Definition 1.** *For ease of exposition, we shall rewrite the dual problems so that we consider minimizing convex objective functions. More formally, the original problem is then given by*

$$\boldsymbol{\alpha}^* = \underset{\boldsymbol{\alpha} \in \mathbb{R}^n}{\text{argmin}} \left\{ D(\boldsymbol{\alpha}) := \sum_{i=1}^n f_i^*(\alpha_i) + \frac{1}{2n\lambda} \boldsymbol{\alpha}^\top \mathbf{K} \boldsymbol{\alpha} \right\}. \quad (9)$$

The problem worker  $k$  solves is described by

$$\tilde{\boldsymbol{\alpha}} = \underset{\boldsymbol{\alpha} \in \mathbb{R}^n}{\text{argmin}} \left\{ \tilde{D}_k(\boldsymbol{\alpha}) := \sum_{i=1}^n f_i^*(\alpha_i) + \frac{1}{2n\lambda} \boldsymbol{\alpha}^\top \tilde{\mathbf{K}}_k \boldsymbol{\alpha} \right\}. \quad (10)$$

Recall that  $\tilde{\mathbf{K}}_k = \tilde{\mathbf{X}}_k \tilde{\mathbf{X}}_k^\top$ , where  $\tilde{\mathbf{X}}_k$  is the concatenation of the  $\tau$  raw features and  $\tau_{\text{subs}}$  random features for worker  $k$ .

To proceed we need the following result which relates the solution of the original problem to that of the approximate problem solved by worker  $k$ .

**Lemma 3** (Adapted from Lemma 1 [17]). *Let  $\boldsymbol{\alpha}^*$  and  $\tilde{\boldsymbol{\alpha}}$  be as defined in Definition 1. We obtain*

$$\frac{1}{\lambda} (\tilde{\boldsymbol{\alpha}} - \boldsymbol{\alpha}^*)^\top (\mathbf{K} - \tilde{\mathbf{K}}_k) \boldsymbol{\alpha}^* \geq \frac{1}{\lambda} (\tilde{\boldsymbol{\alpha}} - \boldsymbol{\alpha}^*)^\top \tilde{\mathbf{K}}_k (\tilde{\boldsymbol{\alpha}} - \boldsymbol{\alpha}^*). \quad (11)$$

*Proof.* See [17].  $\square$

For our main result, we rely heavily on the following variant of Theorem 1 in [17] which bounds the difference between the coefficients estimated by worker  $k$ ,  $\tilde{\boldsymbol{\beta}}_k$  and the corresponding coordinates of the optimal solution vector  $\boldsymbol{\beta}^*$ .

**Lemma 4** (Local optimization error. Adapted from [17]). *For  $\rho = \sqrt{\frac{c_0 \log(2r/\delta)r}{\tau_{\text{subs}}}}$  the following holds*

$$\|\tilde{\boldsymbol{\beta}}_k - \boldsymbol{\beta}^*\|_2 \leq \frac{\rho}{1 - \rho} \|\boldsymbol{\beta}^*\|_2$$

with probability at least  $1 - (\delta + \frac{p-\tau}{e^r})$ .

The proof closely follows the proof of Theorem 1 in [17] which we restate here identifying the major differences.

*Proof.* Let the quantities  $\tilde{D}_k(\boldsymbol{\alpha})$ ,  $\tilde{\mathbf{K}}_k$ , be as in Definition 1. For ease of notation, we shall omit the subscript  $k$  in  $\tilde{D}_k(\boldsymbol{\alpha})$  and  $\tilde{\mathbf{K}}_k$  in the following.

By the SVD we have  $\mathbf{X} = \mathbf{U}\mathbf{\Sigma}\mathbf{V}^\top$ . So  $\mathbf{K} = \mathbf{U}\mathbf{\Sigma}\mathbf{\Sigma}\mathbf{U}^\top$  and  $\tilde{\mathbf{K}} = \mathbf{U}\mathbf{\Sigma}\mathbf{V}^\top \mathbf{\Pi}\mathbf{\Pi}^\top \mathbf{V}\mathbf{\Sigma}\mathbf{U}^\top$ . We can make the following definitions

$$\boldsymbol{\gamma}^* = \mathbf{\Sigma}\mathbf{U}^\top \boldsymbol{\alpha}^*, \quad \tilde{\boldsymbol{\gamma}} = \mathbf{\Sigma}\mathbf{U}^\top \tilde{\boldsymbol{\alpha}}.$$

Defining  $\tilde{\mathbf{M}} = \mathbf{V}^\top \mathbf{\Pi}\mathbf{\Pi}^\top \mathbf{V}$  and plugging these into Lemma 3 we obtain

$$(\tilde{\boldsymbol{\gamma}} - \boldsymbol{\gamma}^*)^\top (\mathbf{I} - \tilde{\mathbf{M}}) \boldsymbol{\gamma}^* \geq (\tilde{\boldsymbol{\gamma}} - \boldsymbol{\gamma}^*)^\top \tilde{\mathbf{M}} (\tilde{\boldsymbol{\gamma}} - \boldsymbol{\gamma}^*). \quad (12)$$

We now bound the spectral norm of  $\mathbf{I} - \tilde{\mathbf{M}}$  using Lemma 2. Recall that Lemma 2 bounds the difference between a matrix and its approximation by a *distributed* dimensionality reduction using the SRHT.

Using the Cauchy-Schwarz inequality we have for the l.h.s. of (12)

$$(\tilde{\boldsymbol{\gamma}} - \boldsymbol{\gamma}^*)^\top (\mathbf{I} - \tilde{\mathbf{M}}) \boldsymbol{\gamma}^* \leq \rho \|\boldsymbol{\gamma}^*\|_2 \|\tilde{\boldsymbol{\gamma}} - \boldsymbol{\gamma}^*\|_2$$

For the r.h.s. of (12), we can write

$$\begin{aligned} & (\tilde{\boldsymbol{\gamma}} - \boldsymbol{\gamma}^*)^\top \tilde{\mathbf{M}} (\tilde{\boldsymbol{\gamma}} - \boldsymbol{\gamma}^*) \\ &= \|\tilde{\boldsymbol{\gamma}} - \boldsymbol{\gamma}^*\|_2^2 - (\tilde{\boldsymbol{\gamma}} - \boldsymbol{\gamma}^*)^\top (\mathbf{I} - \tilde{\mathbf{M}}) (\tilde{\boldsymbol{\gamma}} - \boldsymbol{\gamma}^*) \\ &\geq \|\tilde{\boldsymbol{\gamma}} - \boldsymbol{\gamma}^*\|_2^2 - \rho \|\tilde{\boldsymbol{\gamma}} - \boldsymbol{\gamma}^*\|_2^2 \\ &= (1 - \rho) \|\tilde{\boldsymbol{\gamma}} - \boldsymbol{\gamma}^*\|_2^2. \end{aligned}$$

Combining these two expressions and inequality (12) yields

$$\begin{aligned} (1-\rho)\|\tilde{\gamma}-\gamma^*\|_2^2 &\leq \rho\|\gamma^*\|_2\|\tilde{\gamma}-\gamma^*\|_2 \\ (1-\rho)\|\tilde{\gamma}-\gamma^*\|_2 &\leq \rho\|\gamma^*\|_2. \end{aligned} \quad (13)$$

From the definition of  $\gamma^*$  and  $\tilde{\gamma}$  above and  $\beta^*$  and  $\tilde{\beta}$ , respectively we have

$$\beta^* = -\frac{1}{n\lambda}\mathbf{V}\gamma^*, \quad \tilde{\beta} = -\frac{1}{n\lambda}\mathbf{V}\tilde{\gamma}$$

so  $\frac{1}{n\lambda}\|\gamma^*\|_2 = \|\beta^*\|_2$  and  $\|\tilde{\beta}-\beta^*\|_2 = \frac{1}{n\lambda}\|\tilde{\gamma}-\gamma^*\|_2$  due to the orthonormality of  $\mathbf{V}$ . Plugging this into (13) and using the fact that  $\|\beta^*-\tilde{\beta}\|_2 \geq \|\beta_k^*-\tilde{\beta}_k\|_2$  we obtain the stated result.  $\square$

## B Proof of Row Summing Lemma

*Proof of Lemma 2.* Let  $\mathbf{V}_k$  contain the first  $\tau$  rows of  $\mathbf{V}$  and let  $\mathbf{V}_{(-k)}$  be the matrix containing the remaining rows. Decompose the matrix products as follows

$$\begin{aligned} \mathbf{V}^\top\mathbf{V} &= \mathbf{V}_k^\top\mathbf{V}_k + \mathbf{V}_{(-k)}^\top\mathbf{V}_{(-k)} \\ &\text{and} \\ \mathbf{V}^\top\Theta_S\Theta_S^\top\mathbf{V} &= \mathbf{V}_k^\top\mathbf{V}_k + \tilde{\mathbf{V}}_k^\top\tilde{\mathbf{V}}_k \end{aligned}$$

with  $\tilde{\mathbf{V}}_k^\top = \mathbf{V}_{(-k)}^\top\mathbf{\Pi}$ . Then

$$\begin{aligned} \|\mathbf{V}^\top\Theta_S\Theta_S^\top\mathbf{V} - \mathbf{V}^\top\mathbf{V}\|_2 &= \|\mathbf{V}_k^\top\mathbf{V}_k + \tilde{\mathbf{V}}_k^\top\tilde{\mathbf{V}}_k - \mathbf{V}_k^\top\mathbf{V}_k - \mathbf{V}_{(-k)}^\top\mathbf{V}_{(-k)}\|_2 \\ &= \|\mathbf{V}_{(-k)}^\top\mathbf{\Pi\Pi}^\top\mathbf{V}_{(-k)} - \mathbf{V}_{(-k)}^\top\mathbf{V}_{(-k)}\|_2. \end{aligned}$$

Since  $\Theta_S$  is an orthogonal matrix, from Lemma 3.3 in [13] and Lemma 5, summing  $(K-1)$  independent SRHTs from  $\tau$  to  $\tau_{subs}$  is equivalent to applying a single SRHT from  $p-\tau$  to  $\tau_{subs}$ . Therefore we can simply apply Lemma 1 of [15] to the above to obtain the result.  $\square$

**Lemma 5** (Summed row sampling). *Let  $\mathbf{W}$  be an  $n \times p$  matrix with orthonormal columns. Let  $\mathbf{W}_1, \dots, \mathbf{W}_K$  be a balanced, random partitioning of the rows of  $\mathbf{W}$  where each matrix  $\mathbf{W}_k$  has exactly  $\tau = n/K$  rows. Define the quantity  $M := n \cdot \max_{j=1, \dots, n} \|e_j^\top \mathbf{W}\|_2^2$ . For a positive parameter  $\alpha$ , select the subsample size*

$$l \cdot K \geq \alpha M \log(p).$$

Let  $\mathbf{S}_{T_k} \in \mathbb{R}^{l \times \tau}$  denote the operation of uniformly at random sampling a subset,  $T_k$  of the rows of  $\mathbf{W}_k$  by sampling  $l$  coordinates from  $\{1, 2, \dots, \tau\}$  without replacement. Now denote  $\mathbf{SW}$  as the sum of the subsampled rows

$$\mathbf{SW} = \sum_{k=1}^K (\mathbf{S}_{T_k} \mathbf{W}_k).$$

Then

$$\sqrt{\frac{(1-\delta)l \cdot K}{n}} \leq \sigma_p(\mathbf{SW})$$

and

$$\sigma_1(\mathbf{SW}) \leq \sqrt{\frac{(1+\eta)l \cdot K}{n}}$$

with failure probability at most

$$p \cdot \left[ \frac{e^{-\delta}}{(1-\delta)^{1-\delta}} \right]^{\alpha \log p} + p \cdot \left[ \frac{e^\eta}{(1+\eta)^{1+\eta}} \right]^{\alpha \log p}$$

*Proof.* Define  $\mathbf{w}_j^\top$  as the  $j^{\text{th}}$  row of  $\mathbf{W}$  and  $M := n \cdot \max_j \|\mathbf{w}_j\|_2^2$ . Suppose  $K = 2$  and consider the matrix

$$\begin{aligned} \mathbf{G}_2 &:= (\mathbf{S}_1 \mathbf{W}_1 + \mathbf{S}_2 \mathbf{W}_2)^\top (\mathbf{S}_1 \mathbf{W}_1 + \mathbf{S}_2 \mathbf{W}_2) \\ &= (\mathbf{S}_1 \mathbf{W}_1)^\top (\mathbf{S}_1 \mathbf{W}_1) + (\mathbf{S}_2 \mathbf{W}_2)^\top (\mathbf{S}_2 \mathbf{W}_2) \\ &\quad + (\mathbf{S}_1 \mathbf{W}_1)^\top (\mathbf{S}_2 \mathbf{W}_2) + (\mathbf{S}_2 \mathbf{W}_2)^\top (\mathbf{S}_1 \mathbf{W}_1). \end{aligned}$$

In general, we can express  $\mathbf{G} := (\mathbf{SW})^\top (\mathbf{SW})$  as

$$\mathbf{G} := \sum_{k=1}^K \sum_{j \in T_k} \left( \mathbf{w}_j \mathbf{w}_j^\top + \sum_{k' \neq k} \sum_{j' \in T_{k'}} \mathbf{w}_j \mathbf{w}_{j'}^\top \right).$$

By the orthonormality of  $\mathbf{W}$ , the cross terms cancel as  $\mathbf{w}_j \mathbf{w}_{j'}^\top = \mathbf{0}$ , yielding

$$\mathbf{G} := (\mathbf{SW})^\top (\mathbf{SW}) = \sum_{k=1}^K \sum_{j \in T_k} \mathbf{w}_j \mathbf{w}_j^\top.$$

We can consider  $\mathbf{G}$  as a sum of  $l \cdot K$  random matrices

$$\mathbf{X}_1^{(1)}, \dots, \mathbf{X}_1^{(K)}, \dots, \mathbf{X}_l^{(1)}, \dots, \mathbf{X}_l^{(K)}$$

sampled uniformly at random without replacement from the family  $\mathcal{X} := \{\mathbf{w}_i \mathbf{w}_i^\top : i = 1, \dots, \tau \cdot K\}$ .

To use the matrix Chernoff bound in Lemma 6, we require the quantities  $\mu_{\min}$ ,  $\mu_{\max}$  and  $B$ . Noticing that  $\lambda_{\max}(\mathbf{w}_j \mathbf{w}_j^\top) = \|\mathbf{w}_j\|_2^2 \leq \frac{M}{n}$ , we can set  $B \leq M/n$ .

Taking expectations with respect to the random partitioning ( $\mathbb{E}_P$ ) and the subsampling within each partition ( $\mathbb{E}_S$ ), using the fact that columns of  $\mathbf{W}$  are orthonormal we obtain

$$\mathbb{E} \left[ \mathbf{X}_1^{(k)} \right] = \mathbb{E}_P \mathbb{E}_S \mathbf{X}_1^{(k)} = \frac{1}{K} \frac{1}{\tau} \sum_{i=1}^{K\tau} \mathbf{w}_i \mathbf{w}_i^\top = \frac{1}{n} \mathbf{W}^\top \mathbf{W} = \frac{1}{n} \mathbf{I}$$

Recall that we take  $l$  samples in  $K$  blocks so we can define

$$\mu_{\min} = \frac{l \cdot K}{n} \quad \text{and} \quad \mu_{\max} = \frac{l \cdot K}{n}.$$

Plugging these values into Lemma 6, the lower and upper Chernoff bounds respectively yield

$$\mathbb{P} \left\{ \lambda_{\min}(\mathbf{G}) \leq (1 - \delta) \frac{l \cdot K}{n} \right\} \leq p \cdot \left[ \frac{e^{-\delta}}{(1 - \delta)^{1-\delta}} \right]^{l \cdot K/M} \quad \text{for } \delta \in [0, 1), \text{ and}$$

$$\mathbb{P} \left\{ \lambda_{\max}(\mathbf{G}) \geq (1 + \delta) \frac{l \cdot K}{n} \right\} \leq p \cdot \left[ \frac{e^{\delta}}{(1 + \delta)^{1+\delta}} \right]^{l \cdot K/M} \quad \text{for } \delta \geq 0.$$

Noting that  $\lambda_{\min}(\mathbf{G}) = \sigma_p(\mathbf{G})^2$ , similarly for  $\lambda_{\max}$  and using the identity for  $\mathbf{G}$  above obtains the desired result.  $\square$

For ease of reference, we also restate the Matrix Chernoff bound from [13, 24] but defer its proof to the original papers.

**Lemma 6** (Matrix Chernoff from [13]). *Let  $\mathcal{X}$  be a finite set of positive-semidefinite matrices with dimension  $p$ , and suppose that*

$$\max_{\mathbf{A} \in \mathcal{X}} \lambda_{\max}(\mathbf{A}) \leq B$$

*Sample  $\{\mathbf{A}_1, \dots, \mathbf{A}_l\}$  uniformly at random from  $\mathcal{X}$  without replacement. Compute*

$$\mu_{\min} = l \cdot \lambda_{\min}(\mathbb{E}\mathbf{X}_1) \quad \text{and} \quad \mu_{\max} = l \cdot \lambda_{\max}(\mathbb{E}\mathbf{X}_1)$$

*Then*

$$\mathbb{P} \left\{ \lambda_{\min} \left( \sum_i \mathbf{A}_i \right) \leq (1 - \delta) \mu_{\min} \right\} \leq p \cdot \left[ \frac{e^{-\delta}}{(1 - \delta)^{1-\delta}} \right]^{\mu_{\min}/B} \quad \text{for } \delta \in [0, 1), \text{ and}$$

$$\mathbb{P} \left\{ \lambda_{\max} \left( \sum_i \mathbf{A}_i \right) \geq (1 + \delta) \mu_{\max} \right\} \leq p \cdot \left[ \frac{e^{\delta}}{(1 + \delta)^{1+\delta}} \right]^{\mu_{\max}/B} \quad \text{for } \delta \geq 0.$$

| Algorithm          | K   | TEST MSE          | TRAIN MSE         |
|--------------------|-----|-------------------|-------------------|
| DUAL-LOCO 0.5      | 12  | 0.0343 (3.75e-03) | 0.0344 (2.59e-03) |
| DUAL-LOCO 0.5      | 24  | 0.0368 (4.22e-03) | 0.0344 (3.05e-03) |
| DUAL-LOCO 0.5      | 48  | 0.0328 (3.97e-03) | 0.0332 (2.91e-03) |
| DUAL-LOCO 0.5      | 96  | 0.0326 (3.13e-03) | 0.0340 (2.67e-03) |
| DUAL-LOCO 0.5      | 192 | 0.0345 (3.82e-03) | 0.0345 (2.69e-03) |
| DUAL-LOCO 1        | 12  | 0.0310 (2.89e-03) | 0.0295 (2.28e-03) |
| DUAL-LOCO 1        | 24  | 0.0303 (2.87e-03) | 0.0307 (1.44e-03) |
| DUAL-LOCO 1        | 48  | 0.0328 (1.92e-03) | 0.0329 (1.55e-03) |
| DUAL-LOCO 1        | 96  | 0.0299 (1.07e-03) | 0.0299 (7.77e-04) |
| DUAL-LOCO 2        | 12  | 0.0291 (2.16e-03) | 0.0280 (6.80e-04) |
| DUAL-LOCO 2        | 24  | 0.0306 (2.38e-03) | 0.0279 (1.24e-03) |
| DUAL-LOCO 2        | 48  | 0.0285 (6.11e-04) | 0.0293 (4.77e-04) |
| CoCoA <sup>+</sup> | 12  | 0.0282 (4.25e-18) | 0.0246 (2.45e-18) |
| CoCoA <sup>+</sup> | 24  | 0.0278 (3.47e-18) | 0.0212 (3.00e-18) |
| CoCoA <sup>+</sup> | 48  | 0.0246 (6.01e-18) | 0.0011 (1.53e-19) |
| CoCoA <sup>+</sup> | 96  | 0.0254 (5.49e-18) | 0.0137 (1.50e-18) |
| CoCoA <sup>+</sup> | 192 | 0.0268 (1.23e-17) | 0.0158 (6.21e-18) |

Table 1: Dogs vs Cats data: Normalized training and test MSE: mean and standard deviations (based on 5 repetitions).

## C Supplementary Material for Section 5

### Algorithm 2 DUAL-LOCO – cross validation

**Input:** Data:  $\mathbf{X}, Y$ , no. workers:  $K$ , no. folds:  $v$

Parameters:  $\tau_{subs}, \lambda_1, \dots, \lambda_l$

- 1: Partition  $\{p\}$  into  $K$  subsets of equal size  $\tau$  and distribute feature vectors in  $\mathbf{X}$  accordingly over  $K$  workers.
- 2: Partition  $\{n\}$  into  $v$  folds of equal size.
- 3: **for each** fold  $f$  **do**
- 4: Communicate indices of training and test points.
- 5: **for each** worker  $k \in \{1, \dots, K\}$  **in parallel do**
- 6: Compute and send  $\mathbf{X}_{k,f}^{train} \mathbf{\Pi}_{k,f}$ .
- 7: Receive random features and construct  $\bar{\mathbf{X}}_{k,f}^{train}$ .
- 8: **for each**  $\lambda_j \in \{\lambda_1, \dots, \lambda_l\}$  **do**
- 9:  $\tilde{\alpha}_{k,f,\lambda_j} \leftarrow \text{LocalDualSolver}(\bar{\mathbf{X}}_{k,f}^{train}, Y_f^{train}, \lambda_j)$
- 10:  $\hat{\beta}_{k,f,\lambda_j} = -\frac{1}{n\lambda_j} \mathbf{X}_{k,f}^{train \top} \tilde{\alpha}_{k,f,\lambda_j}$
- 11:  $\hat{Y}_{k,f,\lambda_j}^{test} = \mathbf{X}_{k,f}^{test} \hat{\beta}_{k,f,\lambda_j}$
- 12: Send  $\hat{Y}_{k,f,\lambda_j}^{test}$  to driver.
- 13: **end for**
- 14: **end for**
- 15: **for each**  $\lambda_j \in \{\lambda_1, \dots, \lambda_l\}$  **do**
- 16: Compute  $\hat{Y}_{f,\lambda_j}^{test} = \sum_{k=1}^K \hat{Y}_{k,f,\lambda_j}^{test}$ .
- 17: Compute  $\text{MSE}_{f,\lambda_j}^{test}$  with  $\hat{Y}_{f,\lambda_j}^{test}$  and  $Y_f^{test}$ .
- 18: **end for**
- 19: **end for**
- 20: **for each**  $\lambda_j \in \{\lambda_1, \dots, \lambda_l\}$  **do**
- 21: Compute  $\text{MSE}_{\lambda_j} = \frac{1}{v} \sum_{f=1}^v \text{MSE}_{f,\lambda_j}$ .
- 22: **end for**

**Output:** Parameter  $\lambda_j$  attaining smallest  $\text{MSE}_{\lambda_j}$
